# Supplementary material for: Remarkable surface-enhanced Raman scattering on self-assembled {201} anatase
Source: Royal Society of Chemistry journal article supplement (doi:10.1039/c9tc05062k), 2019-01-01
Supplement: c9tc05062k1.pdf [file c9tc05062k1.pdf]

## Supplementary Information

# Remarkable Surface Enhanced Raman Scattering on Self-assembled {201} Anatase

*Yaqin Yu,<sup>†,‡</sup> Jingjing Du,<sup>†,‡</sup> and Chuanyong Jing<sup>\*,†,‡</sup>*

<sup>†</sup>State Key Laboratory of Environmental Chemistry and Ecotoxicology, Research Center for

Eco-Environmental Sciences, Chinese Academy of Sciences, Beijing 100085, China.

<sup>‡</sup>University of Chinese Academy of Sciences, Beijing 100049, China.

**Corresponding Author**

\*E-mail: cyjing@rcees.ac.cn

## 22 1. Chemicals and Materials.

23 N, N dimethyl formamide (DMF), tetrabutyltitanate (TBOT), P25, and dopamine (DA) were  
24 purchased from Sigma-Aldrich (St. Louis, US). Hydrofluoric acid (HF), sodium hydroxide  
25 (NaOH), potassium hydroxide (KOH), and sodium chloride (NaCl) were from Sinopharm  
26 Chemical Reagent Co., Ltd (China). Mili-Q water ( $>18.2\text{ M}\Omega$ ) was used to prepare all the  
27 solutions.

## 28 2. Fabrication of Faceted $\text{TiO}_2$ Nanocrystals.

29 {201}  $\text{TiO}_2$ : 8 mL HAc and 12 mL DMF were mixed under magnetic stirring, and 0.5 mL  
30 tetrabutyltitanate (TBOT) was added dropwise. After reacting for 10 min at room temperature,  
31 the homogeneous solution was transferred into a 100 mL Teflon-lined stainless-steel autoclave  
32 and kept in an electric oven at  $180\text{ }^\circ\text{C}$  for 12 h. After cooled down, the precipitate was separated  
33 by centrifugation at 10000 rpm for 10 min, washed with ethanol for five times, and then oven  
34 dried at  $60\text{ }^\circ\text{C}$  overnight.<sup>1</sup>

35 {001}  $\text{TiO}_2$ : 2.5 mL TBOT was added to 60 mL isopropyl alcohol. After the solution was  
36 gently stirred for a few minutes, 1 mL HF was added dropwise. The solution was then  
37 transferred to a 100 mL autoclave and kept in oven at  $200\text{ }^\circ\text{C}$  for 24 h. After cooled to room  
38 temperature, the resulted precipitate was harvested via centrifugation, washed thoroughly with  
39 ethanol, and dried at  $60\text{ }^\circ\text{C}$  overnight.<sup>2</sup>

40 {101}  $\text{TiO}_2$ : 2 g P25 was added to 80 mL of  $10\text{ mol}\cdot\text{L}^{-1}$  KOH solution under magnetic  
41 stirring to form a white suspension. The suspension was equally divided into two 100 mL  
42 autoclaves and kept at  $200\text{ }^\circ\text{C}$  for 24 h. The resulted precipitate was washed with HCl for several  
43 times to attain  $\text{pH}=5$ , then finally dried at  $60^\circ\text{C}$  overnight. After that, 0.2 g of the prepared  
44 potassium titanate nanowires (KTNWs) were dispersed in 24 mL deionized (DI) water under  
45 ultrasonic treatment for 1 h. The solution was then transferred into a 100 mL autoclave and kept  
46 at  $200\text{ }^\circ\text{C}$  for 48 h. The products were collected by centrifugation at 10000 rpm for 10 min,  
47 washed with DI water and oven dried at  $60\text{ }^\circ\text{C}$  overnight.<sup>3</sup>

48 {100} TiO<sub>2</sub>: 2 g P25 was added to 80 mL of 10 mol·L<sup>-1</sup> NaOH solution under magnetic  
49 stirring to form a white suspension. The suspension was then transferred to a 100 mL autoclave  
50 and kept in oven at 120 °C for 24 h. Sodium titanate nanowires (NaTNWs) were separated from  
51 solution by centrifugation and washed with DI water to attain pH=10.5. After that, 2 g NaTNWs  
52 were dispersed into 80 mL DI water, then transferred to a 100 mL autoclave and heated at 200  
53 °C for 24 h. The resulted white precipitates were separated from solution by centrifugation,  
54 washed with DI water, and finally oven dried at 60 °C.<sup>4</sup>

### 55 3. Characterizations.

56 The surface morphology of TiO<sub>2</sub> was examined using a field emission scanning electron  
57 microscope (FE-SEM, SU-8000, Hitachi, JPN) and high resolution-transmission electron  
58 microscope (HRTEM, JEM-2100F, JEOL. Ltd., JPN) The crystal structure was determined  
59 using an X'Pet PRO diffractometer (PANalytical, Netherlands) with Cu K $\alpha$  radiation.  
60 The Brunauer-Emmet-Teller (BET) specific surface area was recorded form N<sub>2</sub> adsorption-  
61 desorption isotherms using a Surface Area and Porosity Analyzer (ASAP 2020 Plus HD88,  
62 Micromeritics, USA) after degassed in a vacuum at 120°C for 12 h. The electron  
63 paramagnetic resonance (EPR) signals were recorded on a Bruker EMX plus  
64 spectrometer (LOT-Oriel GmbH&Co. KG, Germany). The surface OH density was detected  
65 based on thermogravimetric analysis (TGA) using a TA SDTQ600 (TA instruments, USA). The  
66 UV-vis diffuse reflectance spectra (DRS) were recorded on a scanning UV-vis  
67 spectrophotometer (UV-DRS, UV-2450, Shimadzu, JPN) equipped with an integrating sphere  
68 assembly, while BaSO<sub>4</sub> was used as a reference.

#### 69 3.1. SEM and TEM.

70 The SEM and TEM images (**Figure 1A1, B1**) show that {201} TiO<sub>2</sub> crystals were sea urchin-  
71 like spheres (radius = 500 nm) with exposed {201} facets and unexposed {401} facets.<sup>1</sup> The  
72 {100} TiO<sub>2</sub> nanorods about 500 nm in length exposed dominant {100} facets (80%) with a  
73 lattice spacing of 0.38 nm (Figure 1A2, B2).<sup>4</sup> The highly truncated bipyramidal {001} TiO<sub>2</sub>

74 exhibited two square {001} facets (82%) with a lattice spacing of 0.19 nm.<sup>2</sup> The thickness of  
 75 {001} TiO<sub>2</sub> is 6 nm and a length of 40-50 nm (Figure 1A3, B3). The {101} TiO<sub>2</sub> was octahedral  
 76 crystal with the long axis size of 100 nm (Figure 1A4, B4), and the measured lattice spacing  
 77 was 0.35 nm corresponding to the {101} facet (98%).<sup>3</sup>

78

### 79 3.2. XRD Spectra.

80 The powder X-ray diffraction (XRD) spectra (**Figure S1**) illustrated that the crystal phase of  
 81 four samples was anatase (*I*4<sub>1</sub>/amd, No. 01-084-1286). The tetragonal unit cell of anatase grows  
 82 preferentially along the [101] orientation, resulting in highest (101) diffraction peak in XRD  
 83 spectra.

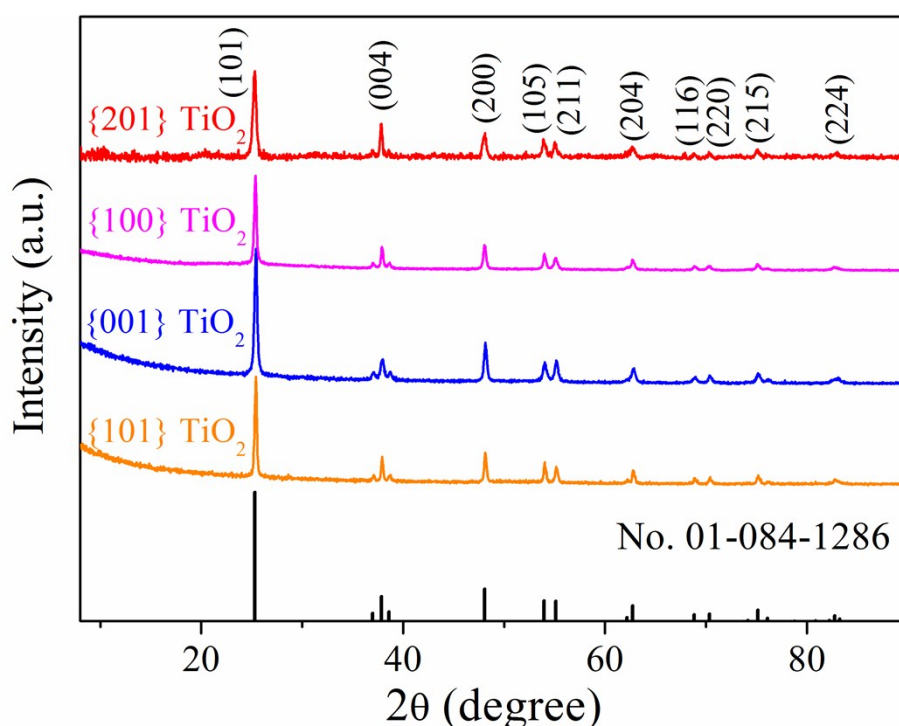

84

85 **Figure S1.** XRD characterization of TiO<sub>2</sub> with {101}, {100}, {001}, and {201} facets.

86

### 87 3.3. Physicochemical Properties of Four Facets.

88 The differences in morphology of four facets contributed to the various specific surface area  
 89 (*S*<sub>BET</sub>), {101} (23.49 m<sup>2</sup>·g<sup>-1</sup>) > {201} (23.22 m<sup>2</sup>·g<sup>-1</sup>) > {001} (21.17 m<sup>2</sup>·g<sup>-1</sup>) > {100} (16.54

90  $\text{m}^2\cdot\text{g}^{-1}$ ). The concentration of oxygen vacancy ( $g=2.00013$ ) followed the order  $\{100\} > \{201\}$   
 91  $> \{101\} > \{001\}$  (**Figure S2A1-A4**), contributed to the specific atomic structure. The surface  
 92 OH density of  $\{201\}$ ,  $\{100\}$ ,  $\{001\}$ , and  $\{101\}$   $\text{TiO}_2$  was 3.6, 3.8, 6.7, and  $0.9 \text{ OH}\cdot\text{nm}^{-2}$  (Figure  
 93 S2B1-B4), ascribed to the different under-coordinated Ti sites. The crystal plane has a great  
 94 impact not only on  $\text{TiO}_2$  morphology and surface atomic arrangement, but also on its physical  
 95 and chemical properties.

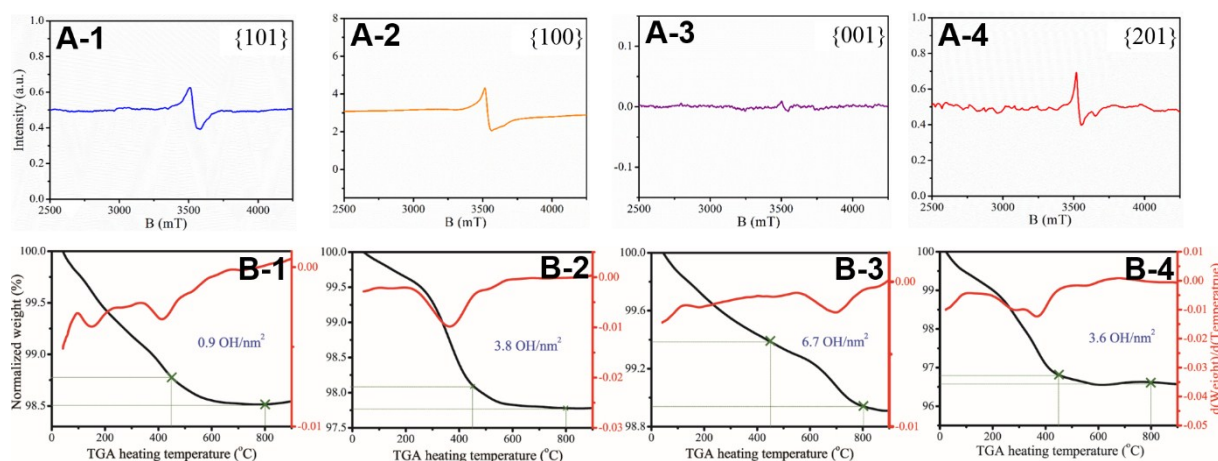

96  
 97 **Figure S2.** EPR spectra (A1-A4) and TGA curves (B1-B4) of  $\text{TiO}_2$  with  $\{101\}$ ,  $\{100\}$ ,  $\{001\}$ ,  
 98 and  $\{201\}$  facets.

#### 100 4. SERS Experiments.

101 Dopamine (DA) was employed as the probe molecule. A mixture containing  $10^{-4}$  to  $10^{-6}$  M DA  
 102 and  $0.1 \text{ g}\cdot\text{L}^{-1}$   $\text{TiO}_2$  was dropped on silicon wafers and detected by the state translation  
 103 nanoparticle-enhanced Raman spectroscopy (STNERS) method, which is based on transition  
 104 from wet to dry states.<sup>5</sup> Raman spectra were collected on a laser confocal microscopy Raman  
 105 spectrometer (LabRAM HR Evolution, HORIBA, JPN) with excitation wavelength at 532 nm.  
 106 The spectra were acquired for 10 s with three accumulations. For each sample, the final Raman  
 107 spectrum was an average of fifteen Raman spectra at different positions on the sample. The  
 108 rough first-order enhancement factors (EFs) was approximately estimated by comparing  
 109 intensity of primary peak at  $1484 \text{ cm}^{-1}$  according to the following equation (1)

$$EF = (I_{SERS}/I_R) \times (N_R/N_{SERS}) \quad (1)$$

$$N_R = (C_R \times V_R)/S_R \quad (2)$$

$$N_{SERS} = (C_{SERS} \times V_{SERS})/S_{SERS} \quad (3)$$

where  $I_{SERS}$  and  $I_R$  are the intensity of same Raman band for SERS and non-SERS spectra of DA, respectively, and  $N_{SERS}$  and  $N_R$  are the average number of DA molecules in scattering area for SERS and non-SERS measurement.  $C_R$  and  $C_{SERS}$  are the molar concentration of DA without and with  $TiO_2$  substrate,  $V_R$  and  $V_{SERS}$  are the volume of DA droplet.  $S_{SERS}$  is the effective area of  $TiO_2$  substrate after solvent evaporation,  $S_R$  is the area of DA droplet on Si wafers after evaporation.

**Table S1.** SERS-active  $TiO_2$  semiconductors

| Semiconductors          | Analyte         | Maximum EF        | Excited wavelength (nm) | Ref.             |
|-------------------------|-----------------|-------------------|-------------------------|------------------|
| $TiO_2$ particle        | pyridine        | low               | 514.5                   | 6                |
| $TiO_2$ mesoporous film | N719 dye        | Low               | 532                     | 7                |
| $TiO_2$ particle        | 4-MBA           | $10^2$ - $10^3$   | 514.5                   | 8-9              |
| $TiO_2$ NPs             | dopamine        | $10^3$            | 442                     | 10-11            |
| $TiO_2$ colloid         | pyrocatechol    |                   | 514.5                   | 12               |
| $TiO_2$ NPs             | nitrothiophenol | $10^2$ - $10^3$   | 633                     | 13               |
| 3D nanostructure        | dye             | $10^6$            | 532                     | 14               |
| $TiO_2$ microarray      | MB              | $10^4$            | 532                     | 15               |
| $TiO_2$ electrode       | cytochrome b5   | 8.6               | 413                     | 16               |
| Mesoporous $TiO_2$ NPs  | 4-MBA           | $10^3$ - $10^5$   | 532                     | 17-18            |
| $TiO_2$ , $WO_3$ film   | R6G             | $10^3$ - $10^5$   | 532                     | 19-20            |
| $W_{18}O_{49}$          | R6G             | $3.4 \times 10^5$ | 532.8                   | 21               |
| $Cu_2O$                 | R6G             | $8.0 \times 10^5$ | 647                     | 22               |
| $Cu_2O$ concave sphere  | crystal violet  | $2.8 \times 10^5$ | 647, 514.5              | 23               |
| {201} $TiO_2$           | dopamine        | $1.6 \times 10^6$ | 532                     | <b>This work</b> |

122

123

**Table S2.** Raman frequency ( $\text{cm}^{-1}$ ) and assignment of DA.

| Band               | DA   | {201}-<br>DA | {100}-<br>DA | {001}-<br>DA | {101}-<br>DA | Assignment                                                                             |
|--------------------|------|--------------|--------------|--------------|--------------|----------------------------------------------------------------------------------------|
| $\nu_{15}$         | 1150 | 1156         | 1152         | 1152         | 1152         | N-H in-plane vibration <sup>24</sup>                                                   |
| $\nu_{\text{C-O}}$ | 1289 | 1268         | 1272         | 1272         | 1274         | Stretching vibrations of the catechol carbon–oxygen <sup>25</sup>                      |
| $\nu_3$            | 1324 | 1334         | 1335         | 1335         | 1335         | Bending vibrations of the aromatic carbon–hydrogen,<br>$\nu(\text{C-H})$ <sup>25</sup> |
| $\nu_{19a}$        | 1466 | 1426         | 1432         | 1434         | 1432         | Stretching vibration of the C-C <sup>24</sup>                                          |
| $\nu_{19b}$        | 1528 | 1484         | 1491         | 1494         | 1491         | Stretching vibration of the C-C<br>bond attached with oxygen <sup>25</sup>             |

124

125 **Figure S3** shows Raman spectra of DA with  $5 \times 10^{-4}$ ,  $5 \times 10^{-5}$  to  $5 \times 10^{-6}$  M concentrations.

126 The selective enhancement indicates that the SERS behavior of {201}  $\text{TiO}_2$  largely depends

127 on different coordination environment.<sup>21</sup>

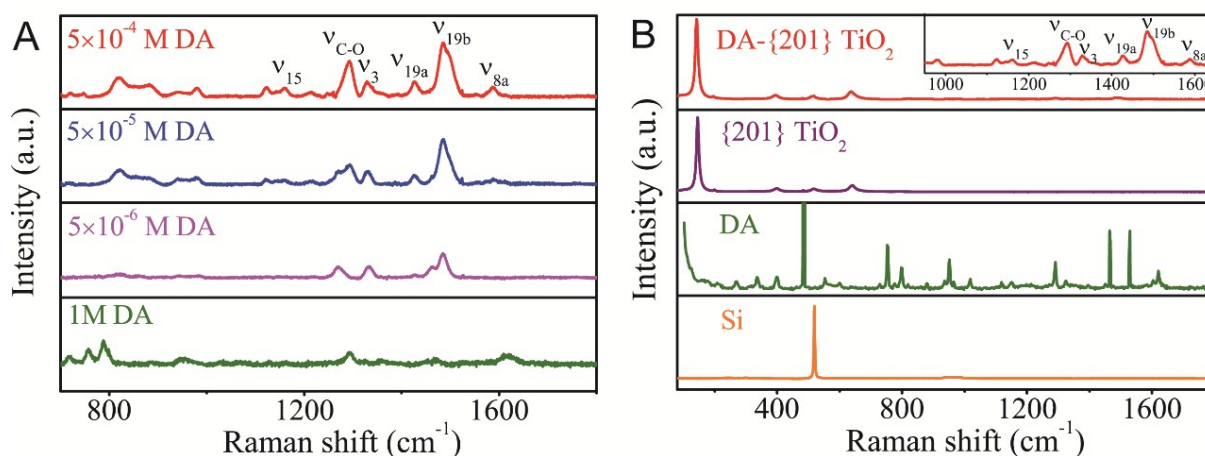

128

**Figure S3.** (A) Raman spectra collected for {201} TiO<sub>2</sub> at three different concentrations DA (5×10<sup>-4</sup>, 5×10<sup>-5</sup>, and 5×10<sup>-6</sup> M). (B) Raman profile of DA (5×10<sup>-4</sup> M) on substrates deposited with {201} TiO<sub>2</sub> sample compared with that for bare Si and {201} TiO<sub>2</sub> substrate.

132

### 5. Online *In Situ* Flow Cell ATR-FTIR.

Flow-cell attenuated total reflectance (ATR) Fourier transform infrared (FTIR) experiments were performed using a Thermo-Nicolet iS50R FTIR spectrometer equipped with a liquid-nitrogen cooled MCT detector. The FTIR information was summarized in **Table S3**, and the peak assignments were conducted based on literature.<sup>25</sup> Compared with DA standard (**Figure S4**), phenol hydroxyl bending vibration  $\nu$  (C-OH) at 1206 cm<sup>-1</sup> was absent, and Ti-O-C stretching vibration at 1226 cm<sup>-1</sup> was present in the spectrum of {201} TiO<sub>2</sub>-DA. The occurrence was associated with the chemical bonding of DA to {201} TiO<sub>2</sub> following a double deprotonation and forming two O-Ti bonds with two surface under-coordinated Ti sites.

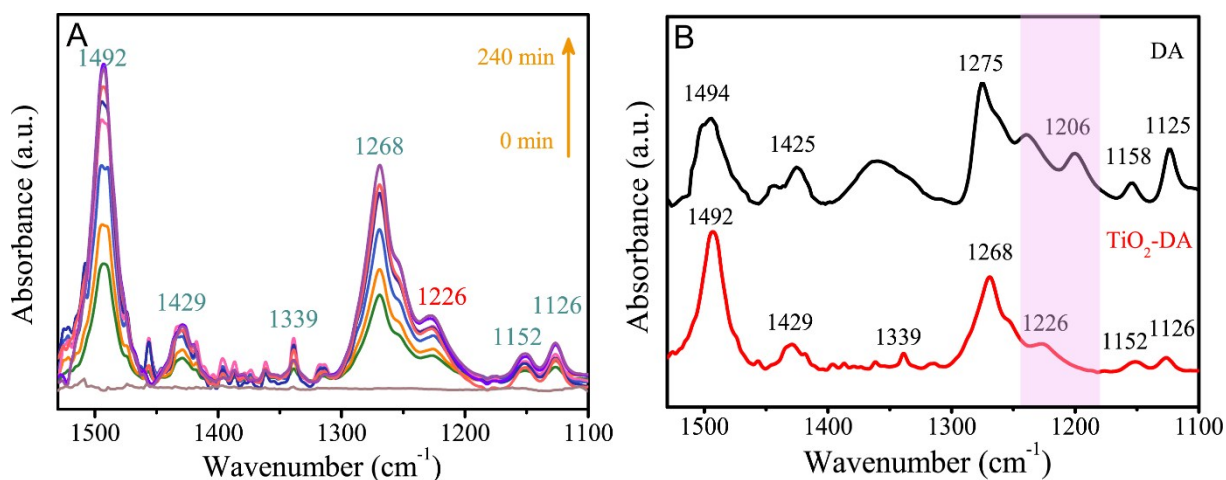

142

**Figure S4.** (A) *In situ* ATR-FTIR spectra for DA adhesion to {201} TiO<sub>2</sub> at pH 5. (B) FTIR spectra for DA and {201} TiO<sub>2</sub>-DA.

145

146

147

148

149

150

**Table S3.** FT-IR frequency (cm<sup>-1</sup>) and assignment of DA.

| Peak position / cm <sup>-1</sup> | Assignment                                             |
|----------------------------------|--------------------------------------------------------|
| 1125                             | C-C stretching vibration                               |
| 1158                             | C-C stretching vibration                               |
| 1206                             | in-plane bending vibrations of the phenolic group C-OH |
| 1275                             | CH <sub>2</sub> bending vibrations                     |
| 1425                             | δ(N-H)                                                 |
| 1494                             | aromatic C=C stretching vibration                      |

151

**152 6. DFT Calculations.**

153 Density functional theory (DFT) calculations were performed using Castep package in  
 154 Materials Studio 7.0 (Accelrys, San Diego, CA). The slab model was cleaved, five layers of  
 155 atoms were extracted, and a 2×2 supercell was built with a vacuum slab of 15 Å. A plane-wave  
 156 cutoff energy of 340 eV was selected, and ultrasoft pseudopotentials were used in the treatment  
 157 of core electrons. The exchange-correlation energy was calculated with the generalized gradient  
 158 approximation (GGA) mode of Perdew-Burke-Ernzerhof (PBE). The k-point over the Brillouin  
 159 zone was set as a 1×2×1 grid. The BFGS method was employed for geometry optimization until  
 160 the SCF and energy tolerances were less than the convergence criteria. The DFT+U method  
 161 was employed, and U=4.0 eV was used, as determined previously.<sup>26</sup>

162 The adsorption energies ( $E_{\text{ads}}$ ) was calculated according to the equation:

$$163 \quad E_{\text{ads}} = E_{\text{mol+surf}} - (E_{\text{surf}} + E_{\text{mol}}) \quad (4)$$

164 Where  $E_{\text{mol+surf}}$  is the total energy of surface complexes;  $E_{\text{surf}}$  is the energy of isolated TiO<sub>2</sub>  
 165 facets; and  $E_{\text{mol}}$  is the energy of an isolated DA molecule. Note that a negative value for  $E_{\text{ads}}$   
 166 suggests a stable adsorption configuration.

167 To investigate the change of electron density upon adsorption, the electron density  
 168 difference ( $\Delta\rho$ ) was calculated by subtracting the electron density of the isolated DA ( $\Delta\rho_{\text{DA}}$ )

169 and surface ( $\Delta\rho_{\text{surf}}$ ) from the total electron density of the system ( $\Delta\rho_{\text{DA+surf}}$ ) as follows:  $\Delta\rho =$   
 170  $\Delta\rho_{\text{DA+surf}} - (\Delta\rho_{\text{surf}} + \Delta\rho_{\text{DA}})$ .

171

## 172 6.1. Adsorption Mode of DA on {201} TiO<sub>2</sub>.

173 Multiple possibilities of DA adsorption on {201} TiO<sub>2</sub> surface were considered (**Figure S5**).

174 The bidentate mode of OH groups of DA bonding on two under-coordinated Ti<sub>4c</sub> sites was the

175 most stable mode based on the adsorption energy.

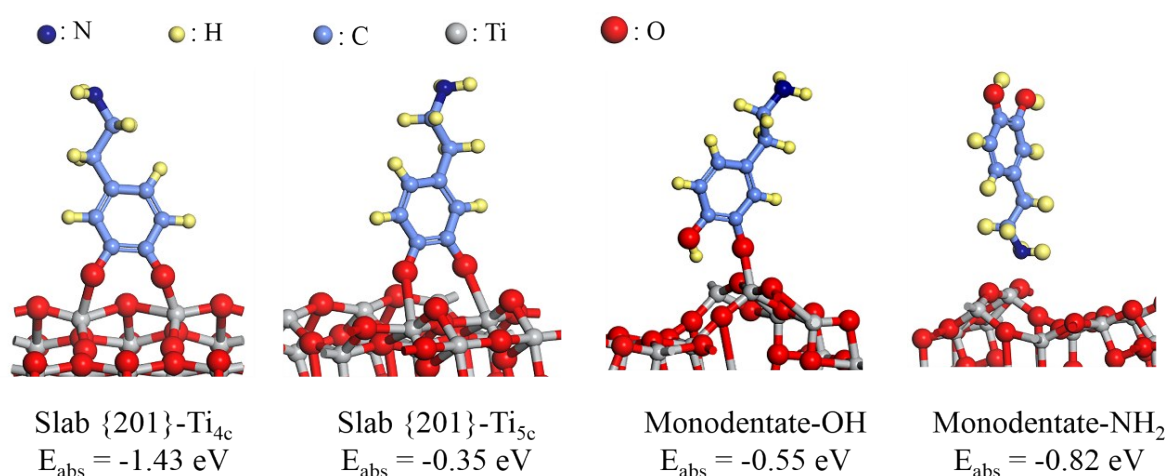

177 **Figure S5.** Multiple adsorption mode of DA on the {201} anatase terminations.

178

## 179 6.2. Surface-Active Sites of Four Faceted TiO<sub>2</sub>.

180 The adsorption structure of DA on four facets was the bidentate mode of bonding OH on two

181 under-coordinated Ti sites (**Figure S6**). The active adsorption sites on {101}, {001} and {100}

182 facets are five-coordinated Ti<sub>5c</sub> atoms, and on {201} facets are four-coordinated Ti<sub>4c</sub> atoms.

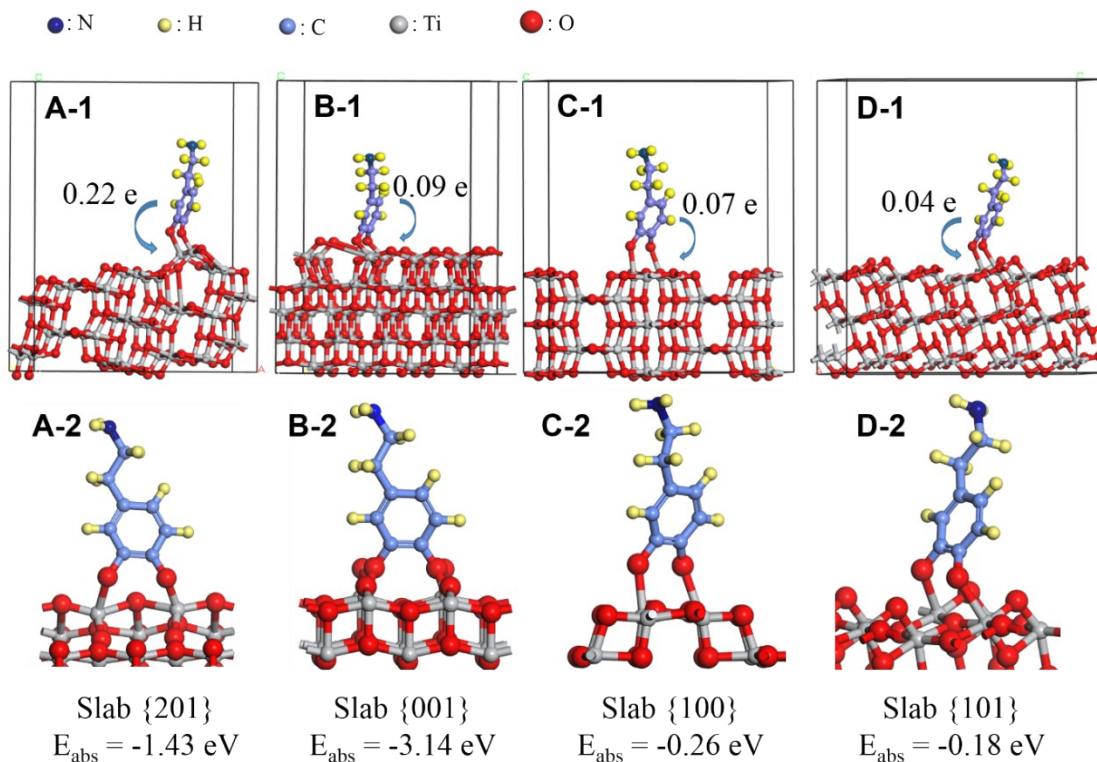

**Figure S6.** Charge transfer (A-1, B-1, C-1, and D-1) and adsorption energy (A-2, B-2, C-2, and D-2) obtained for {201}, {001}, {100}, and {101} anatase terminations.

### 6.3 Surface Electronic Structure.

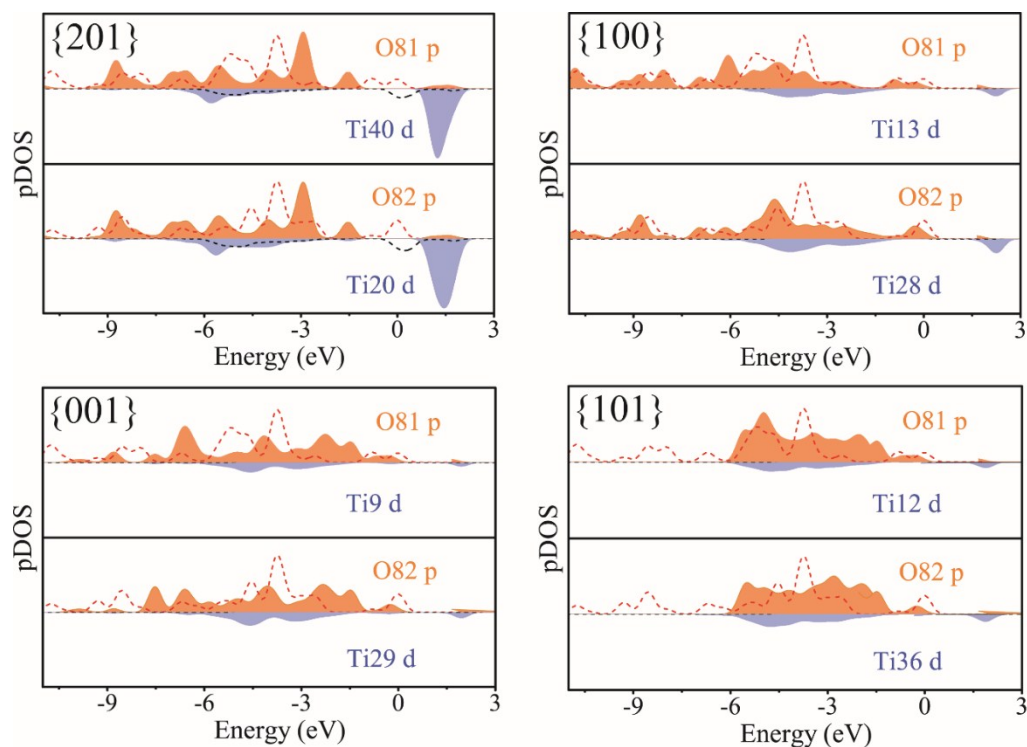

189 **Figure S7.** PDOS of O and Ti before (dashed line) and after (solid line with filled area)  
 190 adsorption for {201} (Ti40 (Ti<sub>4c</sub>), Ti20 (Ti<sub>4c</sub>), O81, and O82), {100} (Ti13 (Ti<sub>5c</sub>), Ti28 (Ti<sub>5c</sub>),  
 191 O81, and O82), {001} (Ti9 (Ti<sub>5c</sub>), Ti29 (Ti<sub>5c</sub>), O81, and O82), and {101} facets (Ti12 (Ti<sub>5c</sub>),  
 192 Ti36 (Ti<sub>5c</sub>), O81, and O82).

193

## 194 7. Charge Transfer between DA and TiO<sub>2</sub>.

### 195 7.1. XANES study.

196 The DA adsorption samples were prepared by reacting 0.1 mM DA with 0.1 g·L<sup>-1</sup> TiO<sub>2</sub> in 0.01  
 197 M NaCl solution at pH 5. After 24 h mixing, the suspensions were centrifuged at 10000 rpm  
 198 and freeze-dried under vacuum. All solid samples were deposited on one side of a piece of  
 199 Kapton tape and placed in front of X-ray beam to minimize self-absorption. The K-edge spectra  
 200 of O and L-edge of Ti were collected at beamline 08U at the Shanghai Synchrotron Radiation  
 201 Facility (SSRF, China). X-ray absorption near-edge structures (XANES) spectra were acquired  
 202 from -20 to 20 eV relative to the O K-edge of 543 eV and the Ti L-edge of 460 eV. Spectral  
 203 data processing was analyzed using the Athena program in the Demeter computer package.

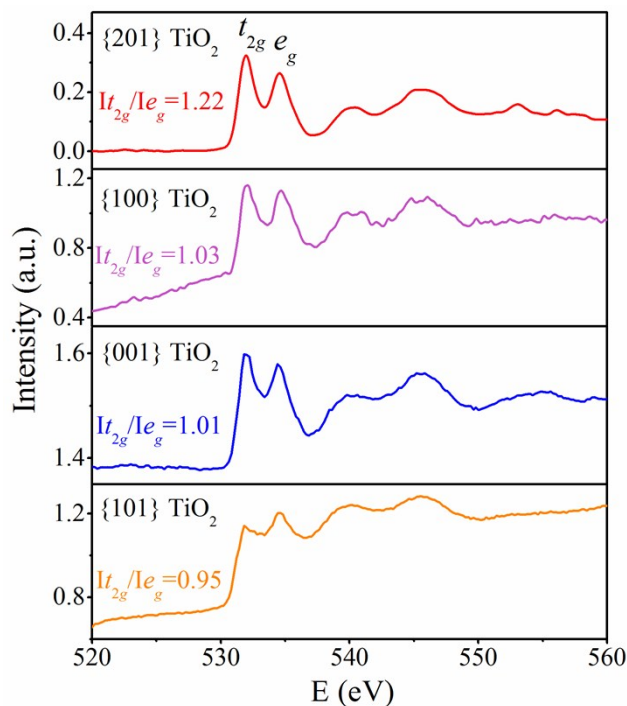

204

205 **Figure S8.** O K-edge XANES spectra of {201}, {100}, {001}, and {101} TiO<sub>2</sub> samples.

206

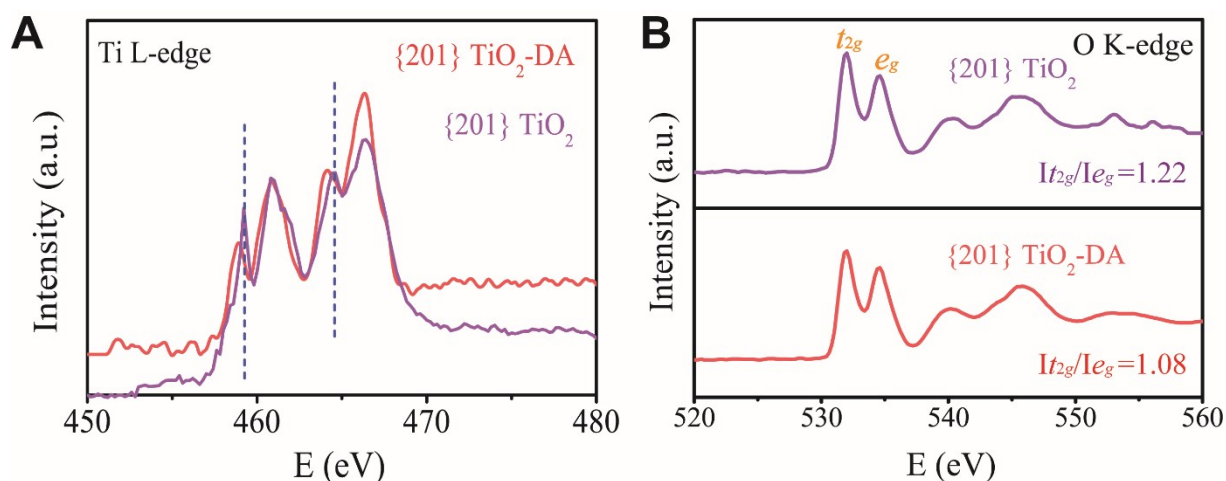

**Figure S9.** (A) Ti L-edge and (B) O K-edge XANES spectra of DA on {201} TiO<sub>2</sub> samples at pH 5.

**Table S4.** Intensity of Ti L-edge and O K-edge XANES spectra.

| Sample               |           | L <sub>III</sub>  |                  |                                   | L <sub>II</sub>   |                  |                                   |
|----------------------|-----------|-------------------|------------------|-----------------------------------|-------------------|------------------|-----------------------------------|
|                      |           | E-t <sub>2g</sub> | E-e <sub>g</sub> | It <sub>2g</sub> /Ie <sub>g</sub> | E-t <sub>2g</sub> | E-e <sub>g</sub> | It <sub>2g</sub> /Ie <sub>g</sub> |
| TiO <sub>2</sub>     | Ti L-edge | 459.2             | 460.9            | 0.90                              | 464.5             | 466.4            | 0.87                              |
|                      | O K-edge  | 531.9             | 534.5            | 1.22                              |                   |                  |                                   |
| TiO <sub>2</sub> -DA | Ti L-edge | 458.9             | 460.8            | 0.66                              | 464.2             | 466.3            | 0.70                              |
|                      | O K-edge  | 531.9             | 534.5            | 1.08                              |                   |                  |                                   |

## 7.2. UV-DRS Study.

The spectrum for DA-{201} TiO<sub>2</sub> presented increased optical adsorption within the whole visible light range, shifted from the band-band transition for TiO<sub>2</sub> (398 nm) and the photo-absorption onset for DA (312 nm). Interestingly, the absorbance followed the order {201} (0.3) > {100} (0.18) > {001} (0.15) > {101} (0.11) (**Figure S10**).

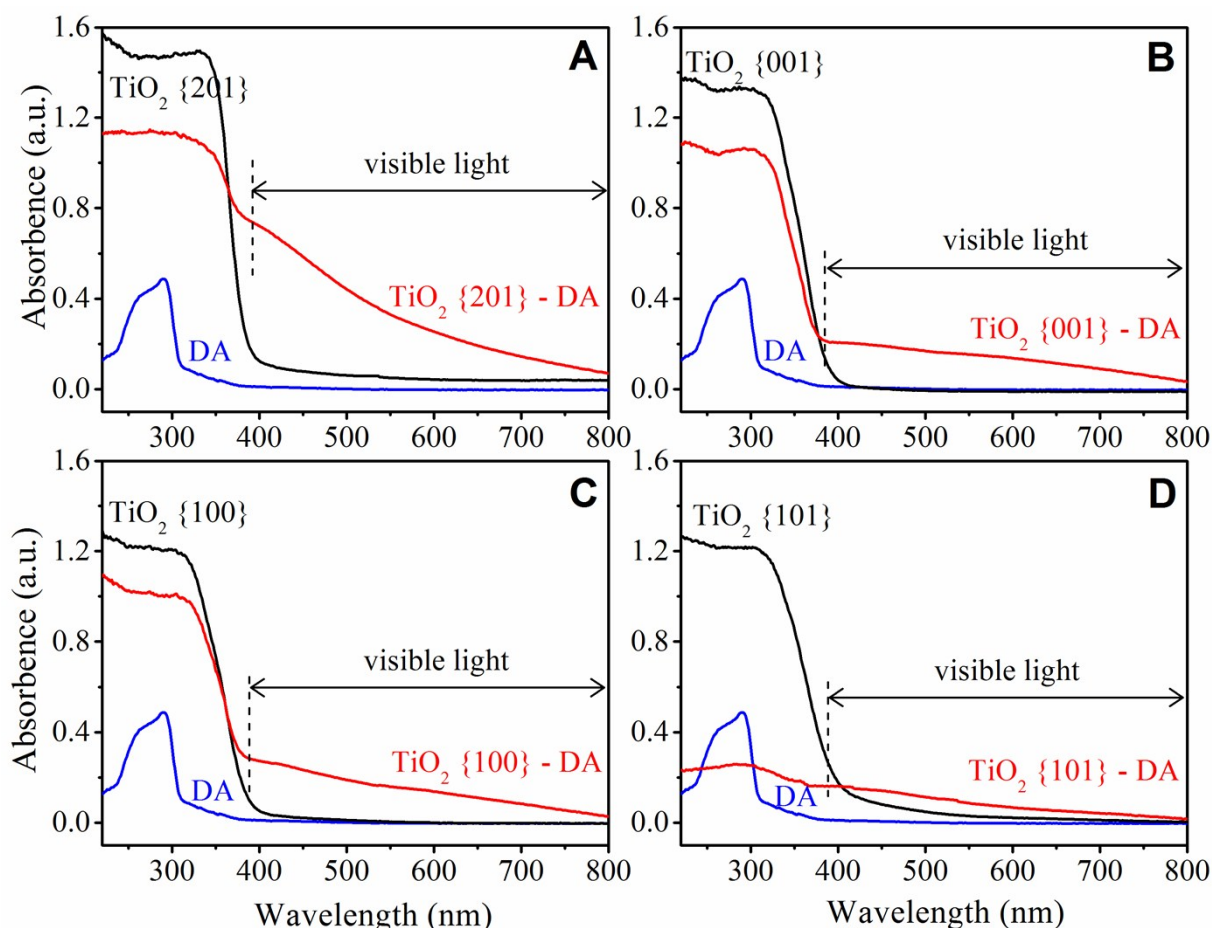

218

219 **Figure S10.** Absorption spectra for DA adsorbed on (A) {201}, (B) {001}, (C) {100}, and (D)  
 220 {101} TiO<sub>2</sub> compared with neat TiO<sub>2</sub> and DA.

221

## 222 **8. *In Situ* Raman-EC Analysis.**

223 To evaluate the charge transfer between adsorbed DA and TiO<sub>2</sub>, *in-situ* Raman-

224 electrochemistry (EC) measurements were performed with a three-electrode system on an

225 electrochemical workstation (PGSTAT302N, Autolab, Switzerland). The commercial glass-

226 carbon electrode (GCE) modified with TiO<sub>2</sub> served as the working electrode, Ag/AgCl as the

227 reference electrode, and Pt wire as the counter electrode. The electrolyte was prepared with 0.1

228 M NaCl and 0.1 mM DA. The photocurrent responses were measured by chrono-amperometry

229 at an applied potential of 1.23 V under continuous on-off Raman excitation ( $\lambda=532$  nm) cycles.

230 The difference photocurrent ( $\Delta I$ ) was obtained by subtracting the current without Raman

231 excitation ( $I_{\text{black}}$ ) from the current with Raman excitation ( $I_{\text{light}}$ ) as follow:  $\Delta I = I_{\text{light}} - I_{\text{black}}$ .

232

233 **Table S5.** Photocurrent of {201}, {101}, {001}, and {100} TiO<sub>2</sub> electrodes in 0.1 M NaCl

234 without and with 0.1 mM DA.

|                      | Current<br>( $\mu\text{A}\cdot\text{cm}^{-2}$ ) | {201} TiO <sub>2</sub> | {100} TiO <sub>2</sub> | {001} TiO <sub>2</sub> | {101} TiO <sub>2</sub> |
|----------------------|-------------------------------------------------|------------------------|------------------------|------------------------|------------------------|
| TiO <sub>2</sub>     | I <sub>light</sub>                              | 2.36                   | 1.75                   | 2.12                   | 2.18                   |
|                      | I <sub>dark</sub>                               | 2.28                   | 1.68                   | 2.04                   | 2.10                   |
|                      | $\Delta I$                                      | 0.08                   | 0.08                   | 0.08                   | 0.08                   |
| TiO <sub>2</sub> +DA | I <sub>light</sub>                              | 24.83                  | 19.03                  | 21.51                  | 21.95                  |
|                      | I <sub>dark</sub>                               | 23.70                  | 18.14                  | 20.76                  | 21.33                  |
|                      | $\Delta I$                                      | 1.13                   | 0.89                   | 0.75                   | 0.63                   |

235

236

237 **Table S6.** Physicochemical properties of four faceted TiO<sub>2</sub>.

| Facets | E <sub>sur</sub><br>(eV) | S <sub>BET</sub><br>(m <sup>2</sup> ·g <sup>-1</sup> ) | OH density<br>(OH·nm <sup>-2</sup> ) | Oxygen<br>vacancies<br>(a.u.) | E <sub>ads</sub><br>(eV) | I <sub>t2g</sub> /I <sub>eg</sub> | EC current<br>( $\mu\text{A}\cdot\text{cm}^{-2}$ ) |
|--------|--------------------------|--------------------------------------------------------|--------------------------------------|-------------------------------|--------------------------|-----------------------------------|----------------------------------------------------|
| {201}  | 1.72                     | 23.22                                                  | 3.6                                  | 0.7                           | -1.43                    | 1.22                              | 1.13                                               |
| {100}  | 0.89                     | 16.54                                                  | 3.8                                  | 4.42                          | -0.26                    | 1.03                              | 0.89                                               |
| {001}  | 0.75                     | 21.17                                                  | 6.7                                  | 0.01                          | -3.14                    | 1.01                              | 0.75                                               |
| {101}  | 0.63                     | 23.49                                                  | 0.9                                  | 0.63                          | -0.18                    | 0.95                              | 0.63                                               |

238

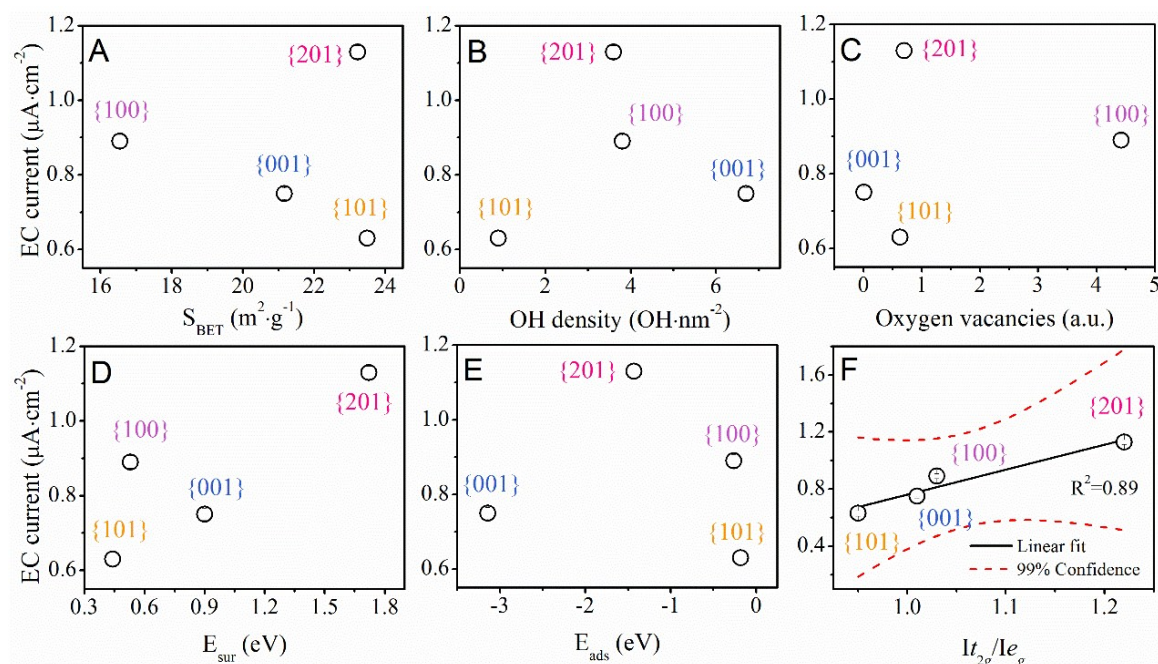

239

240 **Figure S11.** Relationship of EC-measured photocurrent and  $S_{\text{BET}}$  (A), OH density (B), EPR  
 241 intensity of oxygen vacancies (C), surface energy ( $E_{\text{sur}}$ ) (D), adsorption energy ( $E_{\text{ads}}$ ) (E), and  
 242  $I_{t_{2g}}/I_{e_g}$  analyzed by XANES (F).

243

## 244 9. FDTD simulation.

245 The distribution of electromagnetic field intensity of faceted TiO<sub>2</sub> was simulated with three-  
 246 dimensional finite difference time domain (FDTD) solutions software (Lumerical Solutions Inc,  
 247 Vancouver Canada). The mesh size was 1 nm and simulation time was 1000 fs. A 532 nm plane  
 248 wave light source was used to calculate the electromagnetic field distribution. The refractive  
 249 index of TiO<sub>2</sub> was 2.55. The light was incident along the z axis, with the polarization along the  
 250 x axis, and the refractive index of surrounding medium was 1.

251 Four faceted TiO<sub>2</sub> models were established in accordance with their geometrical parameter  
 252 determined by SEM and TEM. The {201} TiO<sub>2</sub> spheres ( $r=500$  nm) were composed with  
 253 exposed {201} facets ( $\alpha=22.5^\circ$ ) and unexposed {401} facets ( $\alpha=11.5^\circ$ ). The {100} TiO<sub>2</sub>  
 254 crystals ( $l=500$  nm) were composed with {100} facets ( $l=340$  nm) and {101} facets ( $l=80$  nm).  
 255 The {001} TiO<sub>2</sub> particles were truncated bipyramids with side length of 40-50 nm. The {101}  
 256 TiO<sub>2</sub> particles were octahedral crystals with long axis size of 100 nm.

257 Considering that asymmetric geometry would impact the transmission of surface plasmon  
 258 polaritons, the influence of incidence angle ( $\theta$ ) on the field distribution was studied in detail by  
 259 FDTD method.<sup>28-29</sup> For  $\{001\}$  and  $\{100\}$   $\text{TiO}_2$  (**Figure S13 and 14**), as incidence angle  
 260 increased from  $0^\circ$  to  $90^\circ$ , the spatial distribution of maximal field enhancement changed from  
 261 edge to specific face. At the same time, the EF of  $\{001\}$  and  $\{100\}$   $\text{TiO}_2$  decreased from 21 to  
 262 9 and from 41 to 15, respectively. Conversely, as incidence angle increased from  $0^\circ$  to  $90^\circ$ , the  
 263 EF of  $\{101\}$  and single spline  $\{201\}$   $\text{TiO}_2$  increased from 12 to 136 and from 14 to 50 (**Figure**  
 264 **S15 and 16**). The spatial distribution of maximal field enhancement changed from edge to  
 265 specific face, and then to sharp tips. The different influence of incidence angle on maximal field  
 266 enhancement indicated that the field enhancement of  $\text{TiO}_2$  crystals was influenced by  
 267 asymmetric structure.

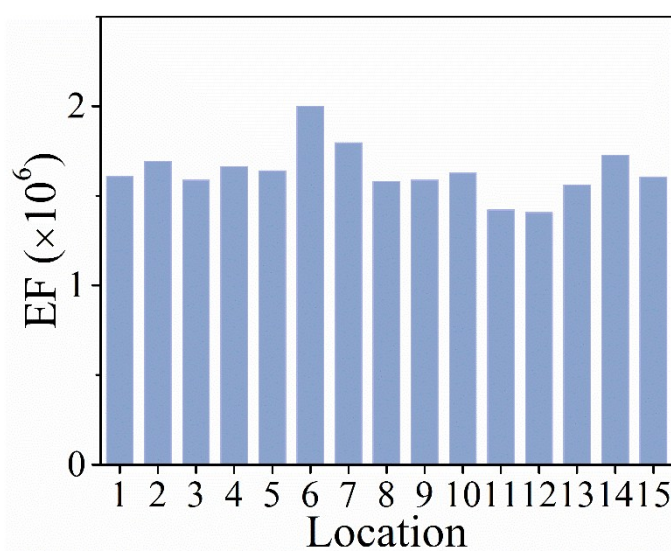

268  
 269 **Figure S12.** SERS enhancement at  $1484\text{ cm}^{-1}$  of fifteen random locations on  $\{201\}$   $\text{TiO}_2$   
 270 substrate.

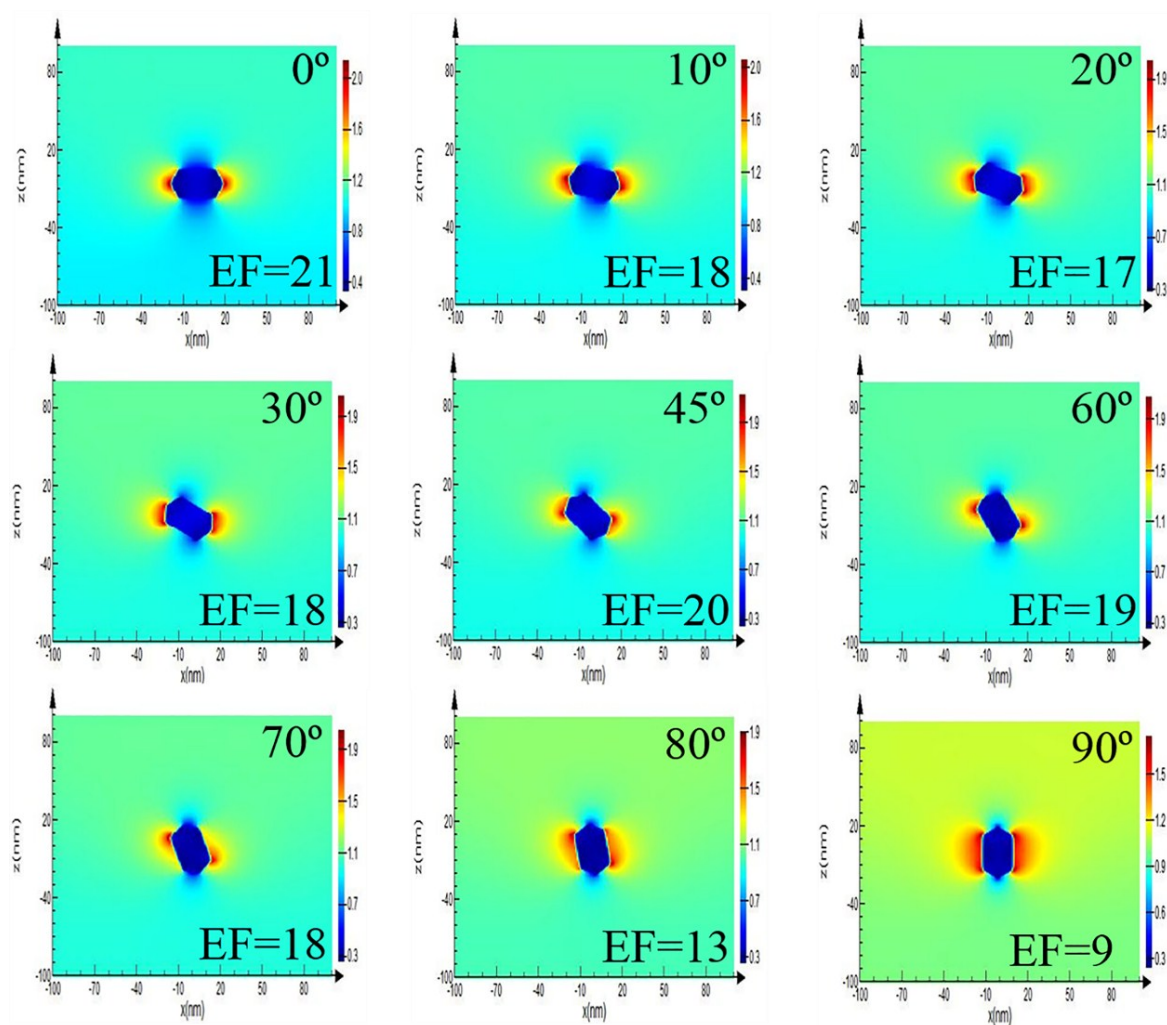

271

272 **Figure S13.** Maximal electric field enhancement of {001}  $\text{TiO}_2$  with  $\theta=0^\circ, 10^\circ, 20^\circ, 30^\circ, 40^\circ,$   
 273  $50^\circ, 60^\circ, 70^\circ, 80^\circ, 90^\circ$ .

274

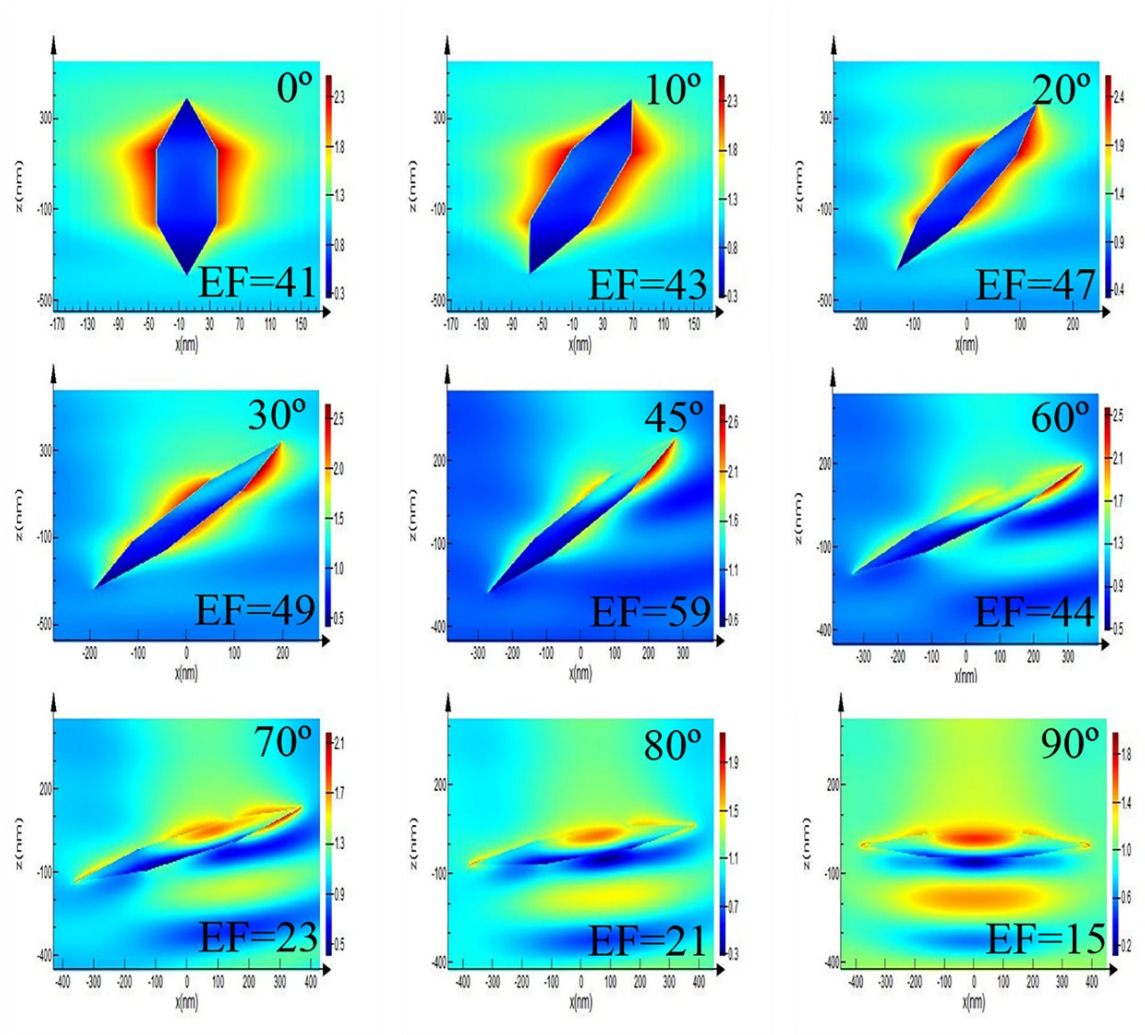

275

276 **Figure S14.** Maximal electric field enhancement of {100} TiO<sub>2</sub> with  $\theta=0^\circ, 10^\circ, 20^\circ, 30^\circ, 40^\circ,$   
 277  $50^\circ, 60^\circ, 70^\circ, 80^\circ, 90^\circ$ .

278

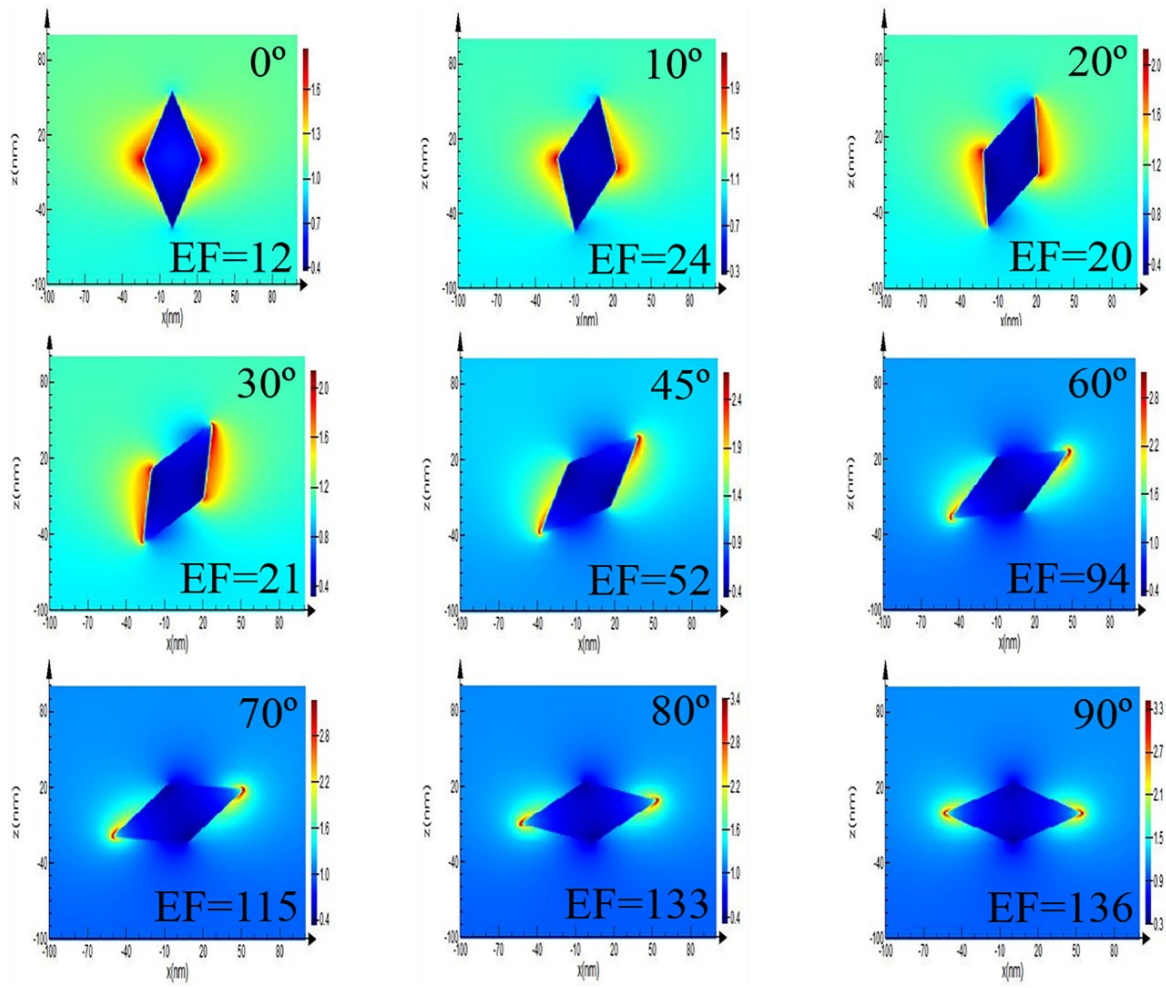

279

280 **Figure S15.** Maximal electric field enhancement of {101} TiO<sub>2</sub> with  $\theta=0^\circ, 10^\circ, 20^\circ, 30^\circ, 40^\circ,$   
 281  $50^\circ, 60^\circ, 70^\circ, 80^\circ, 90^\circ$ .

282

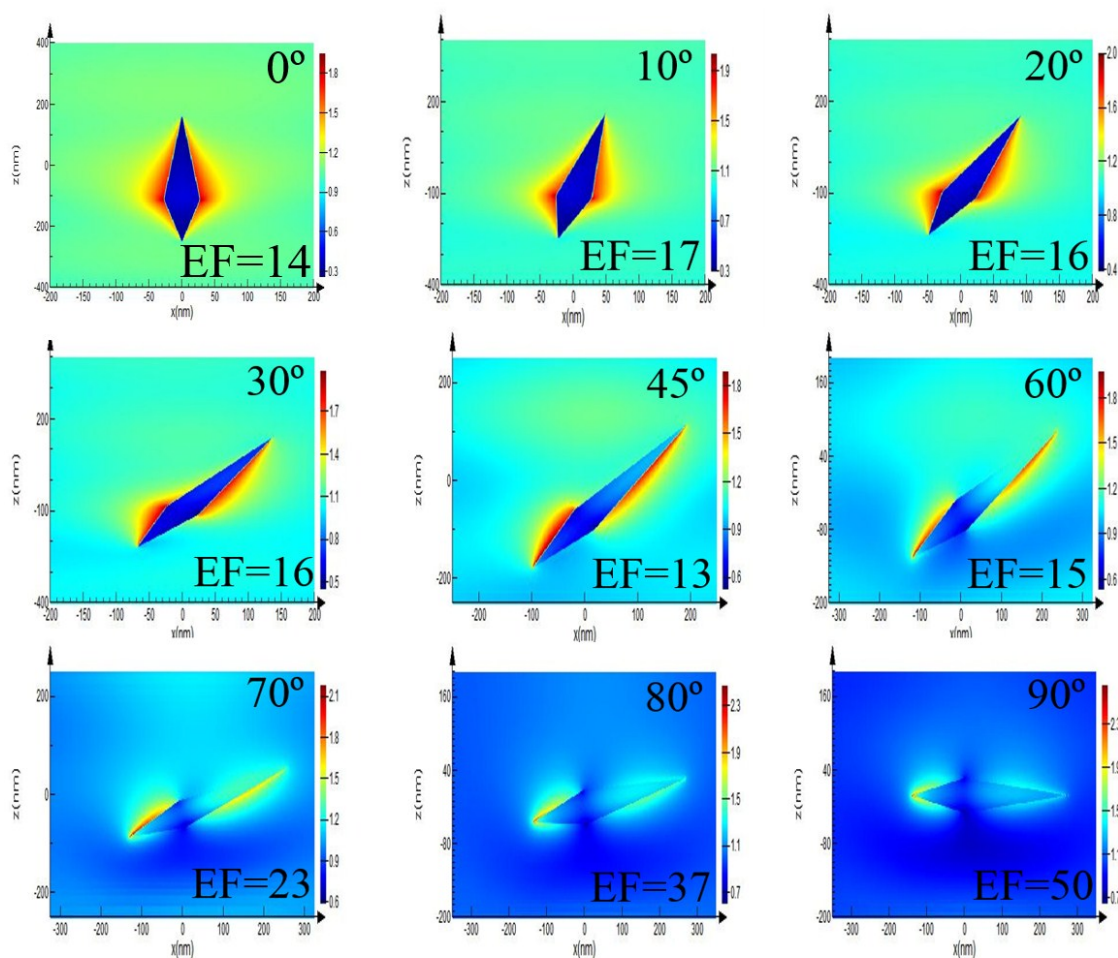

283

284 **Figure S16.** Maximal electric field enhancement of single spine {201}  $\text{TiO}_2$  with  $\theta=0^\circ, 10^\circ,$   
 285  $20^\circ, 30^\circ, 40^\circ, 50^\circ, 60^\circ, 70^\circ, 80^\circ, 90^\circ$ .

286

## 287 References

- 288 1. H. B. Wu, J. S. Chen, X. W. Lou and H. H. Hng, *Nanoscale*, 2011, **3**, 4082-4084.  
 289 2. H. G. Yang, C. H. Sun, S. Z. Qiao, J. Zou, G. Liu, S. C. Smith, H. M. Cheng, and G. Q. Lu,  
 290 *Nature*, 2008, **453**, 638-641.  
 291 3. X. G. Han, F. Zhou, L. Li and C. Wang, *Chem. - Asian J.*, 2013, **8**, 1399-1403.  
 292 4. H. T. Gao, X. M. Sui, D. M. Dai, C. D. Si, and G. J. Liu, *J. Nanosci. Nanotechnol.*, 2015, **15**,  
 293 5193-5197.  
 294 5. L. B. Yang, P. Li, H. L. Liu, X. H. Tang and J. H. Liu, *Chem. Soc. Rev.*, 2015, **44**, 2837-2848.  
 295 6. H. Yamada and Y. Yamamoto, *Surf. Sci.*, 1983, **134**, 71-90.  
 296 7. C. P. Leon, L. Kador, B. Peng and M. Thelakkat, *J. Phys. Chem. B*, 2006, **110**, 8723-8730.  
 297 8. L. Yang, X. Jiang, W. Ruan, B. Zhao, W. Xu and J. R. Lombardi, *J. Phys. Chem. C*, 2008,  
 298 **112**, 20095-20098.

299 9. X. Xue, W. Ji, Z. Mao, H. Mao, Y. Wang, X. Wang, W. Ruan, B. Zhao and J. R. Lombardi,  
300 *J. Phys. Chem. C*, 2012, **116**, 8792-8797.

301 10. A. Musumeci, D. Gosztola, T. Schiller, N. M. Dimitrijevic, V. Mujica, D. Martin and T.  
302 Rajh, *J. Am. Chem. Soc.*, 2009, **131**, 6040-6041.

303 11. S. J. Hurst, H. C. Fry, D. J. Gosztola and T. Rajh, *J. Phys. Chem. C*, 2011, **115**, 620-630.

304 12. W. Ji, W. Song, I. Tanabe, Y. Wang, B. Zhao and Y. Ozaki, *Chem. Commun.*, 2015, **51**,  
305 7641-7644.

306 13. J. S. Teguh, F. Liu, B. Xing and E. K. L. Yeow, *Chem. - Asian J.*, 2012, **7**, 975-981.

307 14. D. Maznichenko, K. Venkatakrishnan and B. Tan, *J. Phys. Chem. C*, 2013, **117**, 578-583.

308 15. D. Qi, L. Lu, L. Wang and J. Zhang, *J. Am. Chem. Soc.*, 2014, **136**, 9886-9889.

309 16. X. X. Han, C. Koehler, J. Kozuch, U. Kuhlmann, L. Paasche, A. Sivanesan, I. M. Weidinger  
310 and P. Hildebrandt, *Small*, 2013, **9**, 4175-4181.

311 17. L. Yang, D. Yin, Y. Shen, M. Yang, X. Li, X. Han, X. Jiang and B. Zhao, *Phys. Chem.*  
312 *Chem. Phys.*, 2017, **19**, 18731-18738.

313 18. L. Yang, D. Yin, Y. Shen, M. Yang, X. Li, X. Han, X. Jiang and B. Zhao, *Phys. Chem.*  
314 *Chem. Phys.*, 2017, **19**, 22302-22308.

315 19. X. Zheng, F. Ren, S. Zhang, X. Zhang, H. Wu, X. Zhang, Z. Xing, W. Qin, Y. Liu and C.  
316 Jiang, *ACS Appl. Mater. Interfaces*, 2017, **9**, 14534-14544.

317 20. M. Wu, H. Wei, Y. Wei, A. Yao, J. Bu, J. Lin, Z. Dong, Y. Chen, Y. Cui and Z. Wu, *Vib.*  
318 *Spectrosc.*, 2018, **95**, 32-37.

319 21. S. Cong, Y. Yuan, Z. Chen, J. Hou, M. Yang, Y. Su, Y. Zhang, L. Li, Q. Li, F. Geng and  
320 Z. Zhao, *Nat. Commun.*, 2015, **6**, 1-7.

321 22. J. Lin, Y. Shang, X. Li, J. Yu, X. Wang and L. Guo, *Adv. Mater.*, 2017, **29**, 1604797.

322 23. X. Li, Y. Shang, J. Lin, A. Li, X. Wang, B. Li and L. Guo, *Adv. Funct. Mater.*, 2018, **28**,  
323 1801868.

324 24. S. Pande, S. Jana, A. K. Sinha, S. Sarkar, M. Basu, M. Pradhan, A. Pal, J. Chowdhury and  
325 T. Pal, *J. Phys. Chem. C*, 2009, **113**, 6989-7002.

326 25. M. L. Roldan, S. A. Centeno and A. Rizzo, *J. Raman Spectrosc.*, 2014, **45**, 1160-1171.

327 26. I. Urdaneta, A. Keller, O. Atabek, J. L. Palma, D. Finkelstein-Shapiro, P. Tarakeshwar, V.  
328 Mujica and M. Calatayud, *J. Phys. Chem. C*, 2014, **118**, 20688-20693.

329 27. W. Niu, Y. A. A. Chua, W. Zhang, H. Huang and X. Lu, *J. Am. Chem. Soc.*, 2015, **137**,  
330 10460-10463.

331 28. W. Zhang, Y. Feng, Y. Zhang, W. Chen and W. Lin, *J. Phys. D-Appl. Phys.*, 2015, **48**,  
332 275102.

333 29. B. Liu, Y.-F. Liu, S.-J. Li and X.-D. He, *Opt. Commun.*, 2016, **369**, 44-49.
